# Supplementary material for: MxNi100−x (M = Ag, and Co) nanoparticles supported on CeO2 nanorods derived from Ce–metal organic frameworks as an effective catalyst for reduction of organic pollutants: Langmuir–Hinshelwood kinetics and mechanism
Source: Royal Society of Chemistry journal article supplement (doi:10.1039/c7nj03009f), 2017-01-01
Supplement: c7nj03009f1.pdf [file c7nj03009f1.pdf]

## Supporting Information

### **M<sub>x</sub>Ni<sub>100-x</sub> (M = Ag, and Co) Nanoparticles Supported on CeO<sub>2</sub> Nanorods Derived from Ce-Metal Organic Frameworks as an Effective Catalyst for Reduction of Organic Pollutants: Langmuir-Hinshelwood Kinetics and Mechanism**

*Mona Kohantorabi, Mohammad Reza Gholami\**

Department of Chemistry, Sharif University of Technology, Tehran, 11365-11155, Iran

\*E-mail: [gholami@sharif.ir](mailto:gholami@sharif.ir)

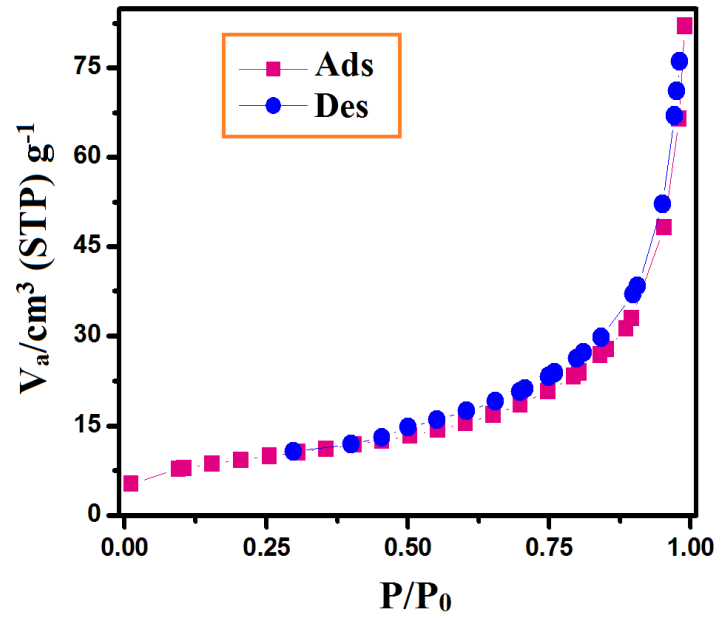

**Figure S1.** Nitrogen adsorption-desorption isotherms of Ag<sub>80</sub>Ni<sub>20</sub>@CeO<sub>2</sub> nanocomposite at 77 K.

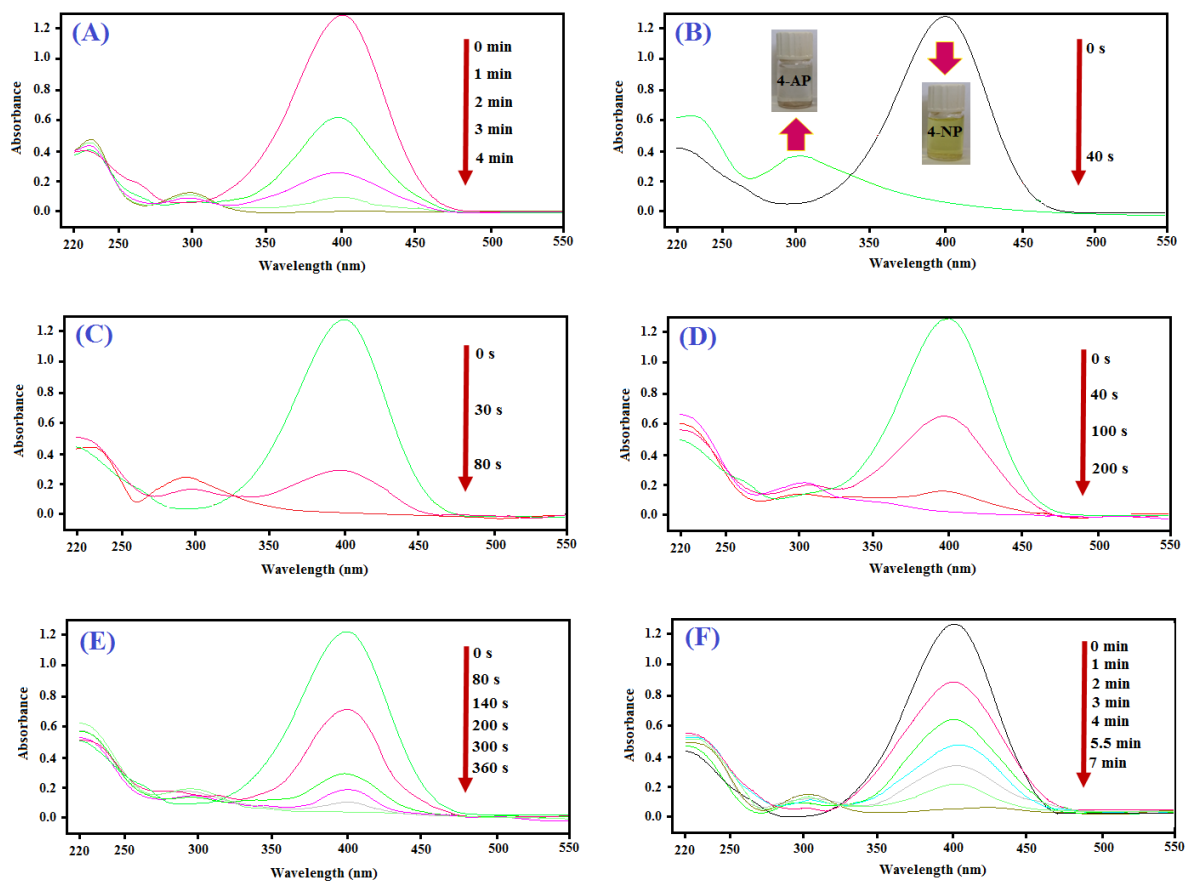

**Figure S2.** UV-vis absorption spectra of the catalytic reduction of 4-NP by  $\text{NaBH}_4$  in the presence of: (A)  $\text{Ag@CeO}_2$ ; (B)  $\text{Ag}_{80}\text{Ni}_{20}\text{@CeO}_2$ ; (C)  $\text{Ag}_{60}\text{Ni}_{40}\text{@CeO}_2$ ; (D)  $\text{Ag}_{40}\text{Ni}_{60}\text{@CeO}_2$ ; (E)  $\text{Ag}_{20}\text{Ni}_{80}\text{@CeO}_2$ , and (F)  $\text{Ni@CeO}_2$ .

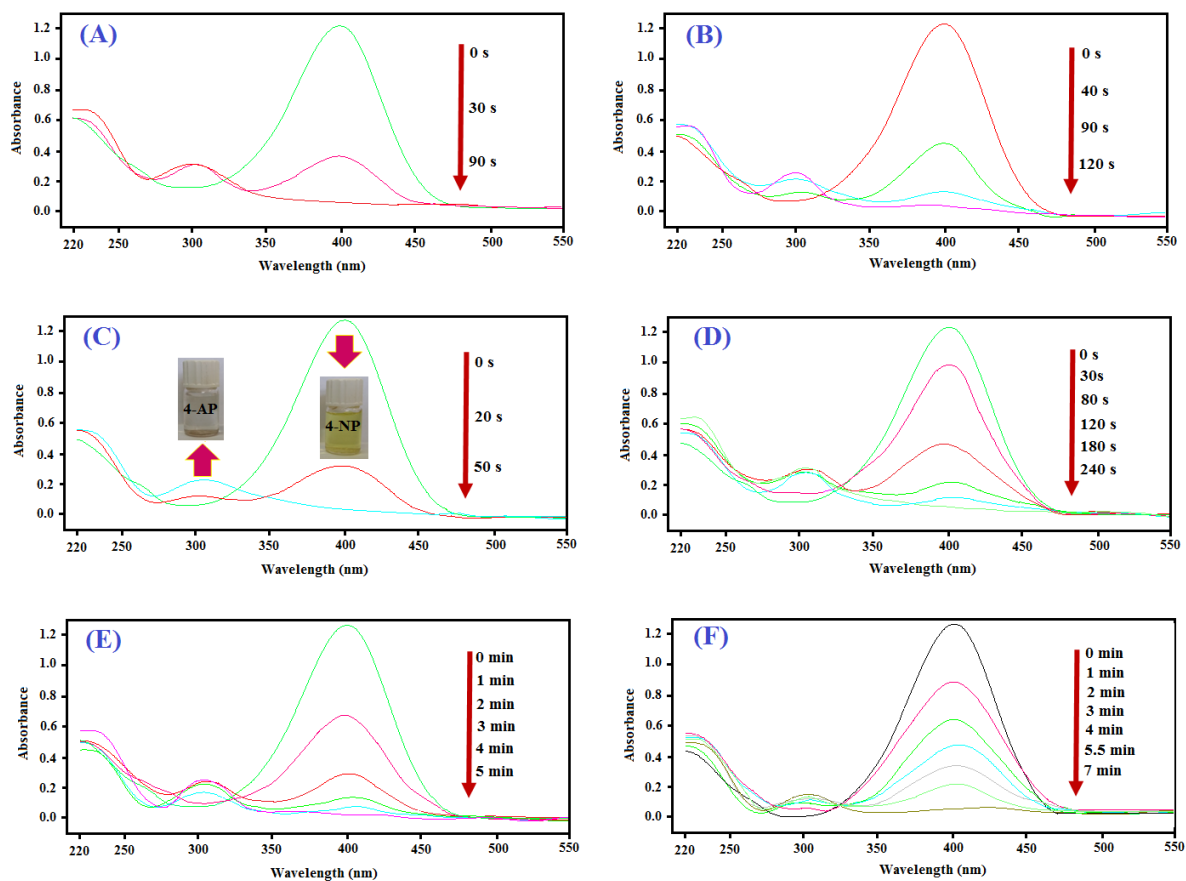

**Figure S3.** UV-vis absorption spectra of the catalytic reduction of 4-NP by  $\text{NaBH}_4$  in the presence of: (A)  $\text{Co@CeO}_2$ ; (B)  $\text{Co}_{80}\text{Ni}_{20}\text{@CeO}_2$ ; (C)  $\text{Co}_{60}\text{Ni}_{40}\text{@CeO}_2$ ; (D)  $\text{Co}_{40}\text{Ni}_{60}\text{@CeO}_2$ ; (E)  $\text{Co}_{20}\text{Ni}_{80}\text{@CeO}_2$ , and (F)  $\text{Ni@CeO}_2$ .

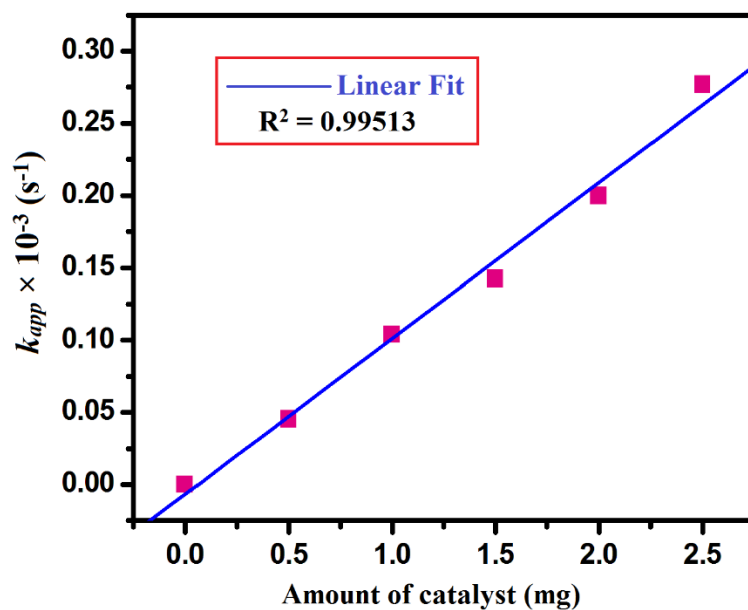

**Figure S4.** Plot of rate constant ( $k_{app}$ ) versus amount of  $Ag_{80}Ni_{20}@CeO_2$  catalyst at 25 °C, [4-NP] = 0.1 mM, and  $[NaBH_4]$  = 0.05 M.

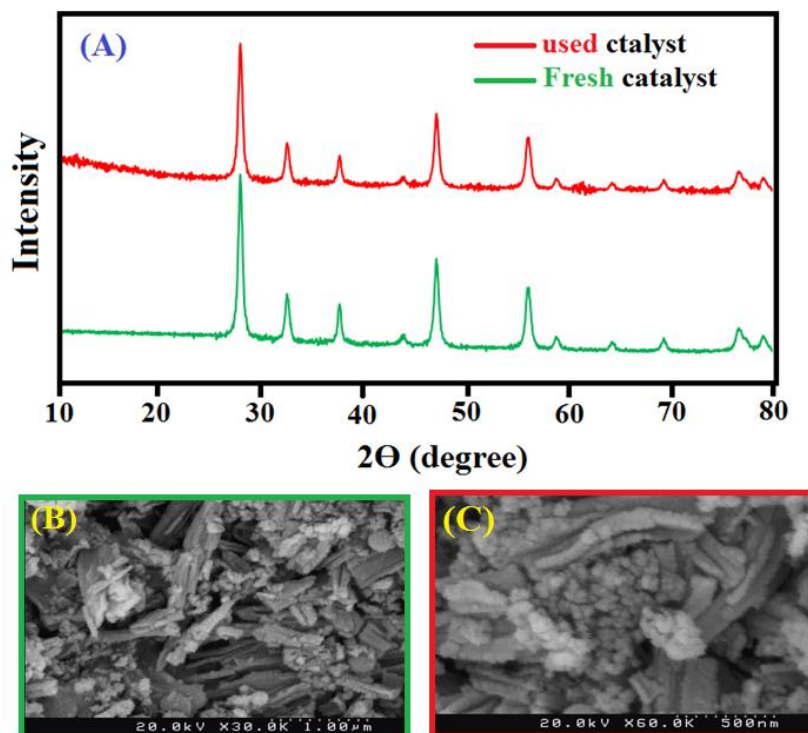

**Figure S5.** XRD patterns of fresh and used Ag<sub>80</sub>Ni<sub>20</sub>@CeO<sub>2</sub> catalyst after five runs (A), and SEM images of fresh (B), and used (C) Ag<sub>80</sub>Ni<sub>20</sub>@CeO<sub>2</sub> nanocomposite after five catalytic runs.

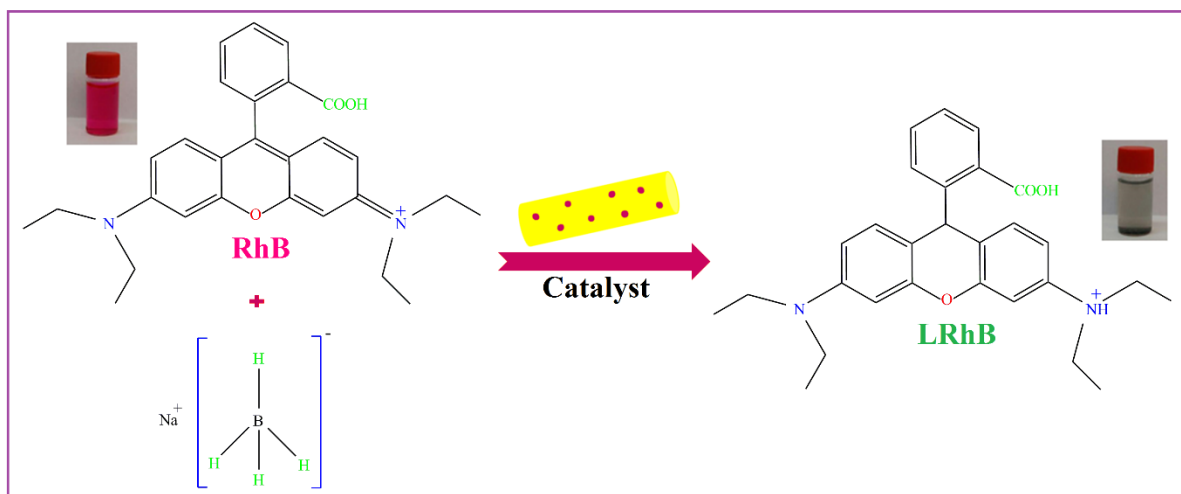

**Figure S6.** The scheme of transforming RhB to LRhB by as-prepared nanocomposites in the presence of  $\text{NaBH}_4$  solution.

**Table S1.** Thermodynamic parameters of 4-NP reduction catalyzed by Ag<sub>80</sub>Ni<sub>20</sub>@CeO<sub>2</sub> nanocomposite at different temperatures.

| Catalyst                                            | $T$<br>(°C) | $k_{app} \times 10^{-3}$<br>(s <sup>-1</sup> ) | TOF $\times 10^{19}$<br>(molecule g <sup>-1</sup> min <sup>-1</sup> ) | $E_a$<br>(kJ mol <sup>-1</sup> ) | $A \times 10^6$ | $\Delta H$<br>(kJ mol <sup>-1</sup> ) | $\Delta S$<br>(J mol <sup>-1</sup> K <sup>-1</sup> ) | $\Delta G$<br>(kJ mol <sup>-1</sup> ) |
|-----------------------------------------------------|-------------|------------------------------------------------|-----------------------------------------------------------------------|----------------------------------|-----------------|---------------------------------------|------------------------------------------------------|---------------------------------------|
| Ag <sub>80</sub> Ni <sub>20</sub> @CeO <sub>2</sub> | 5           | 27.67                                          | 4.817                                                                 |                                  |                 |                                       |                                                      | 76.032                                |
|                                                     | 15          | 58.79                                          | 10.323                                                                |                                  |                 |                                       |                                                      | 77.409                                |
|                                                     | 25          | 103.85                                         | 18.066                                                                | 40.214                           | 1.076           | 37.742                                | -137.735                                             | 78.787                                |
|                                                     | 35          | 171.60                                         | 28.905                                                                |                                  |                 |                                       |                                                      | 80.164                                |
|                                                     | 45          | 245.90                                         | 42.508                                                                |                                  |                 |                                       |                                                      | 81.541                                |



**Table S2.** Thermodynamic parameters of 4-NP reduction catalyzed by Co<sub>60</sub>Ni<sub>40</sub>@CeO<sub>2</sub> nanocomposite at different temperatures.

| Catalyst                                            | $T$<br>(°C) | $k_{app} \times 10^{-3}$<br>(s <sup>-1</sup> ) | TOF $\times 10^{19}$<br>(molecule g <sup>-1</sup> min <sup>-1</sup> ) | $E_a$<br>(kJ mol <sup>-1</sup> ) | $A \times 10^6$ | $\Delta H$<br>(kJ mol <sup>-1</sup> ) | $\Delta S$<br>(J mol <sup>-1</sup> K <sup>-1</sup> ) | $\Delta G$<br>(kJ mol <sup>-1</sup> ) |
|-----------------------------------------------------|-------------|------------------------------------------------|-----------------------------------------------------------------------|----------------------------------|-----------------|---------------------------------------|------------------------------------------------------|---------------------------------------|
| Co <sub>60</sub> Ni <sub>40</sub> @CeO <sub>2</sub> | 5           | 19.52                                          | 3.613                                                                 |                                  |                 |                                       |                                                      | 76.851                                |
|                                                     | 15          | 45.47                                          | 8.029                                                                 |                                  |                 |                                       |                                                      | 78.079                                |
|                                                     | 25          | 83.89                                          | 14.453                                                                | 45.170                           | 6.4509          | 42.699                                | -122.848                                             | 79.307                                |
|                                                     | 35          | 137.93                                         | 24.088                                                                |                                  |                 |                                       |                                                      | 80.536                                |
|                                                     | 45          | 239.02                                         | 42.508                                                                |                                  |                 |                                       |                                                      | 81.764                                |

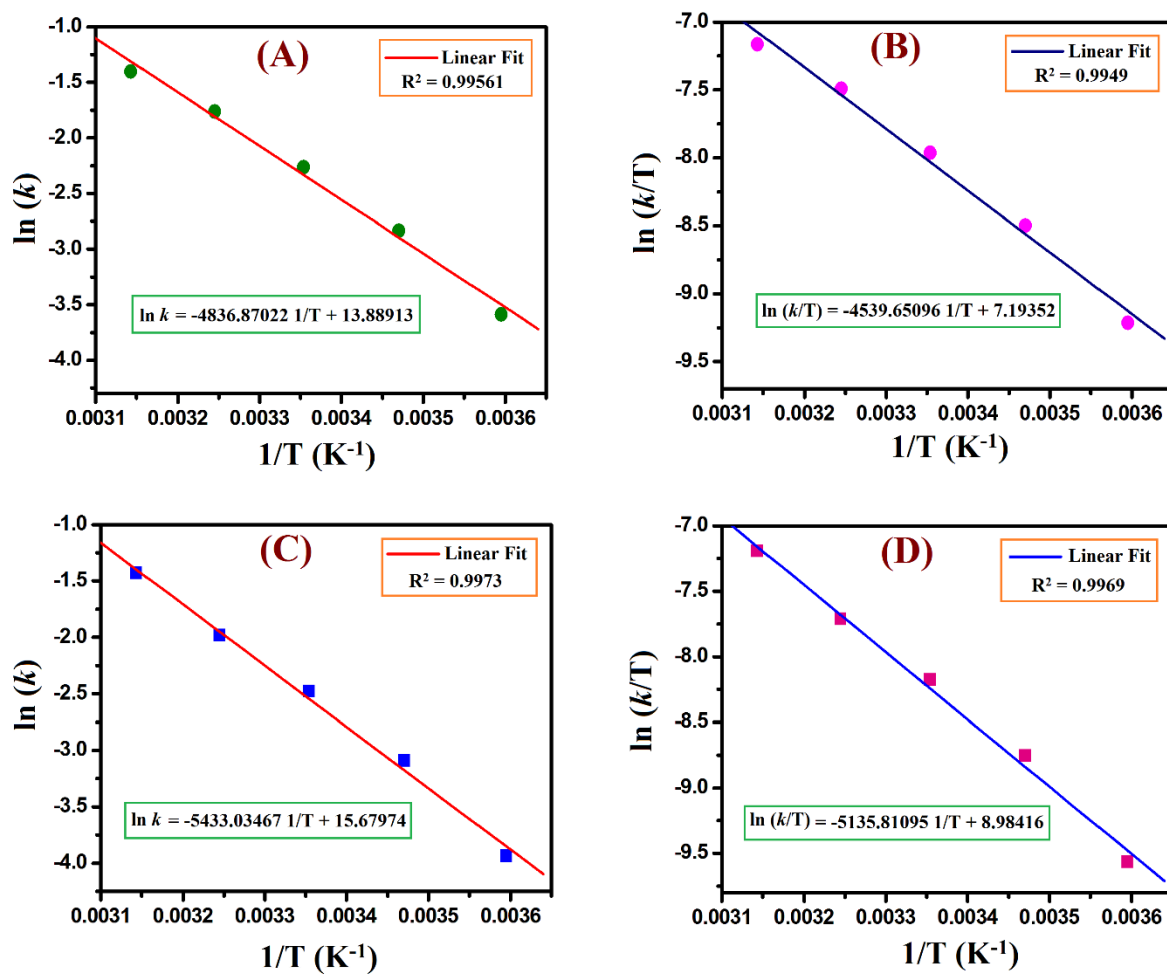

**Figure S7.** Plots of ln(k), and ln(k/T) versus 1/T, for the 4-NP reduction by NaBH<sub>4</sub> in the presence of Ag<sub>80</sub>Ni<sub>20</sub>@CeO<sub>2</sub> (A, and B), and Co<sub>60</sub>Ni<sub>40</sub>@CeO<sub>2</sub> (C, and D) nanocomposites.
